# Supplementary material for: Identification of antisense long noncoding RNAs that function as SINEUPs in human cells
Source: PubMed Central journal article supplement (PMC5028707; doi:10.1038/srep33605), 2016-09-20
Supplement: srep33605-s1.pdf [file srep33605-s1.pdf]

# **Identification of antisense long noncoding RNAs that function as SINEUPs in human cells**

**Aleks Schein<sup>1,2</sup>, Silvia Zucchelli<sup>3,4</sup>, Sakari Kauppinen<sup>2</sup>, Stefano Gustincich<sup>3,5</sup> and Piero Carninci<sup>1\*</sup>**

<sup>1</sup>Division of Genomic Technologies, RIKEN Center for Life Science Technologies, RIKEN Yokohama Campus, 1-7-22 Suehiro-cho, Tsurumi-ku, Yokohama, Kanagawa 230-0045 Japan.

<sup>2</sup>Center for RNA Medicine, Department of Clinical Medicine, Aalborg University Campus Copenhagen, Copenhagen 2450 Denmark

<sup>3</sup>Scuola Internazionale Superiore di Studi Avanzati, Area of Neuroscience, Trieste, Italy

<sup>4</sup>Department of Health Sciences, University of Eastern Piedmont, Novara, Italy

<sup>5</sup>Department of Neuroscience and Brain Technologies, Italian Institute of Technology, Genova, Italy.

A

## RDhi10192.bam

Mapping stats: 100% aligned (97.0M aligned out of 97.0M total)

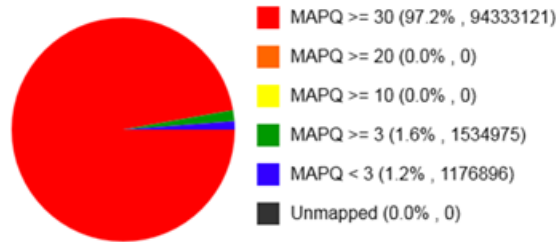

C

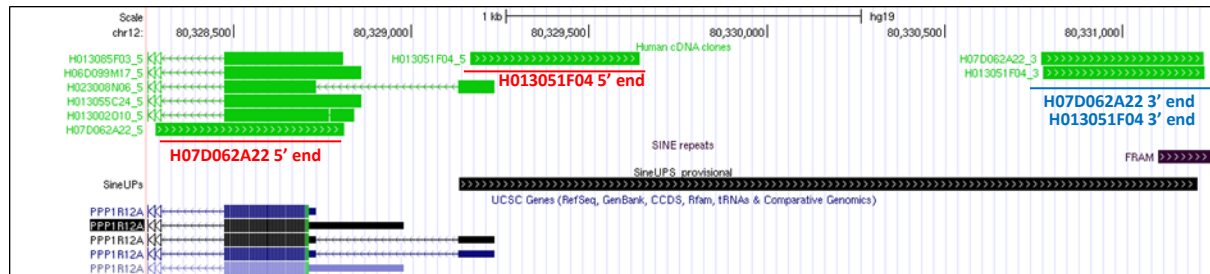

B

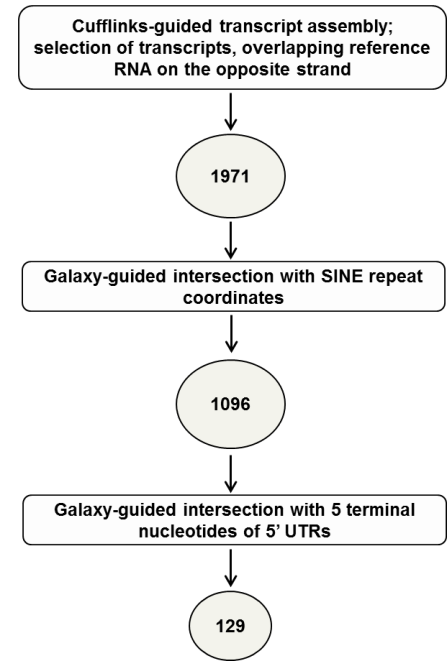

D

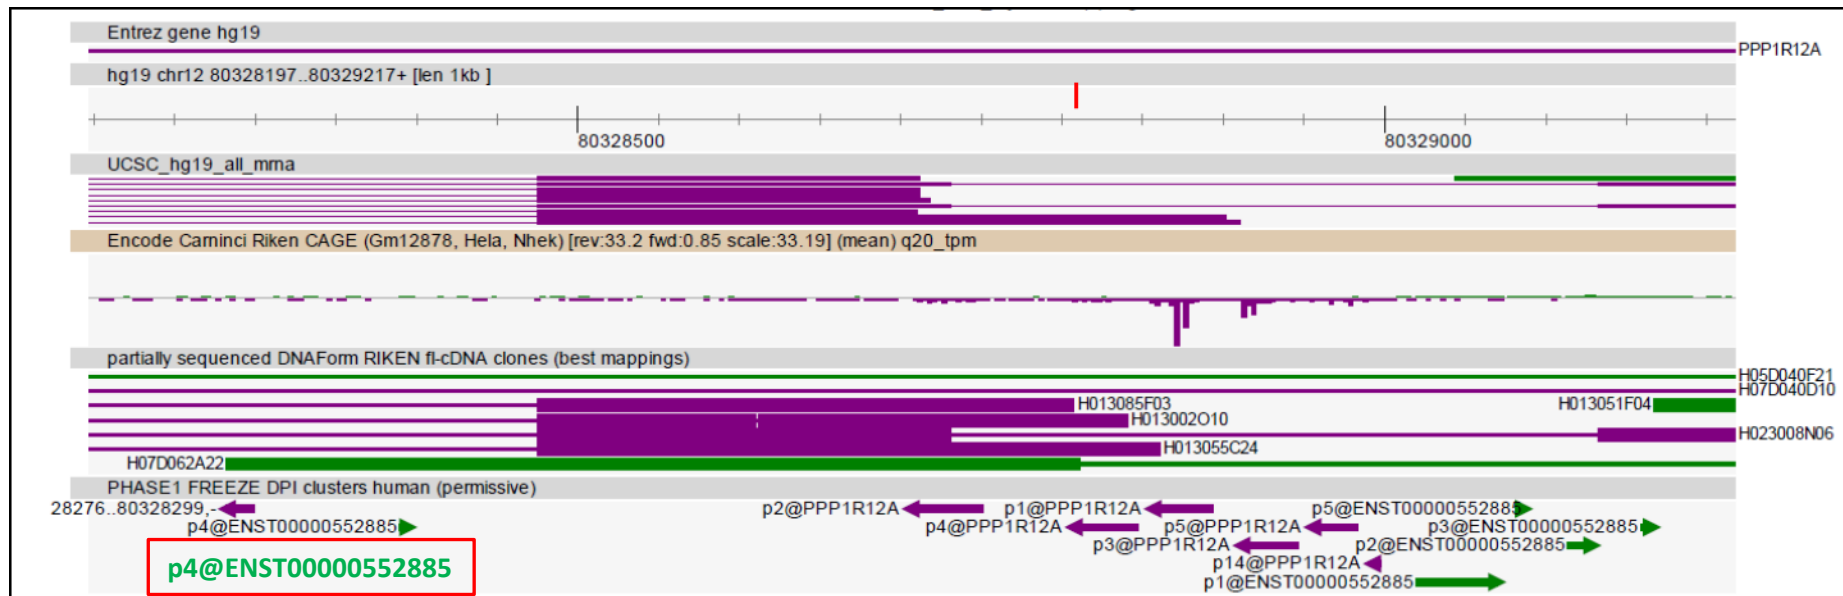

**Supplementary Figure S1. Schematic overview of the human SINEUP discovery pipeline.**

**A.** RNAseq library quality control values. Numbers and percentage of mapped reads with specified quality thresholds are shown. **B.** Schematic overview of the pipeline, used for identification of putative human SINEUPs, with the number of transcripts indicated at each step. **C.** UCSC Genome Browser screenshot, showing the 5' region of PPP1R12A. The R12A-AS1 transcript, assembled by Cufflinks is shown as a black bar. The track named "SINE repeats" indicates the position of SINEs, with the repeat name shown near each repeat element. Green bars depict RIKEN full-length cDNA clones, mapped to the locus with clone names shown on the left side. Note that the mapping positions of only ~500 nucleotides from 5' and 3' end are shown. 5' portions are highlighted by red lines, 3'-by blue lines. **D.** ZENBU genome viewer screenshots, showing the 5' region of H07D062A22 cDNA clone (green bar). PPP1R12A mRNA is shown as a set of purple bars. Green arrows indicate the positions of the TSSs for R12A-AS1, TSS, corresponding to the possible start of H07D062A22 is highlighted with the text box. Colors of transcripts and CAGE peaks are show according to the DNA strand: green for positive strand, purple for negative strand.



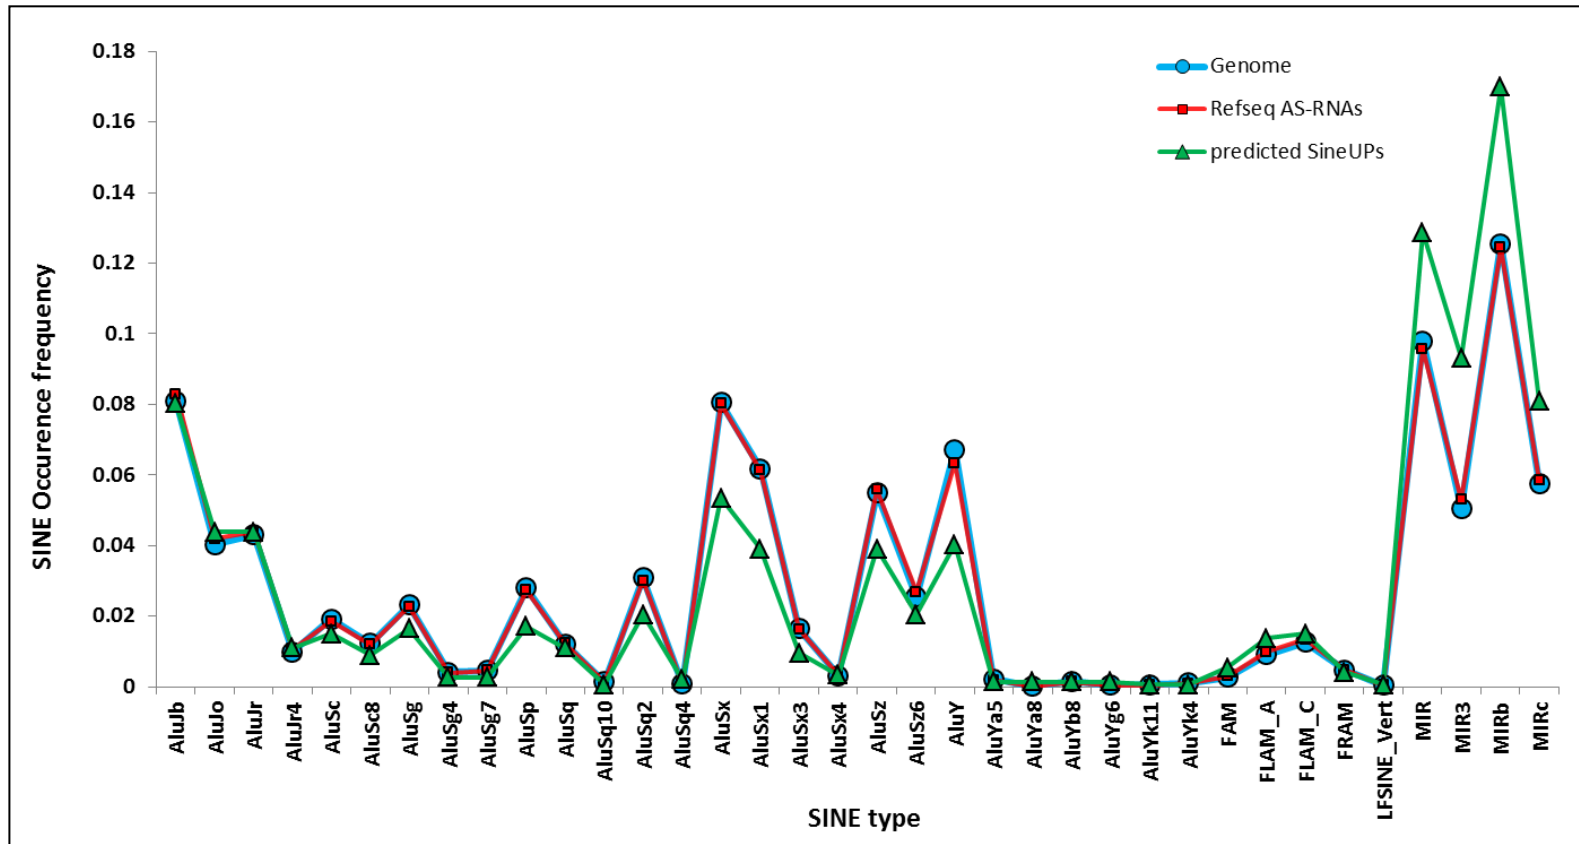

**Supplementary Figure S3 NATs, intersecting 5' ends of mRNAs are not enriched for particular types of SINEs.**

The frequency of each SINE element, present in candidate SINEUP RNAs, listed in Supplementary table 2 (n=1460) was calculated and compared with corresponding general SINE frequency, calculated for the human genome (n=1,793,723) and for antisense RNAs, recorded in the RefSeq database (n=900182). 3 frequencies for each SINE type were plotted on the combined line chart.

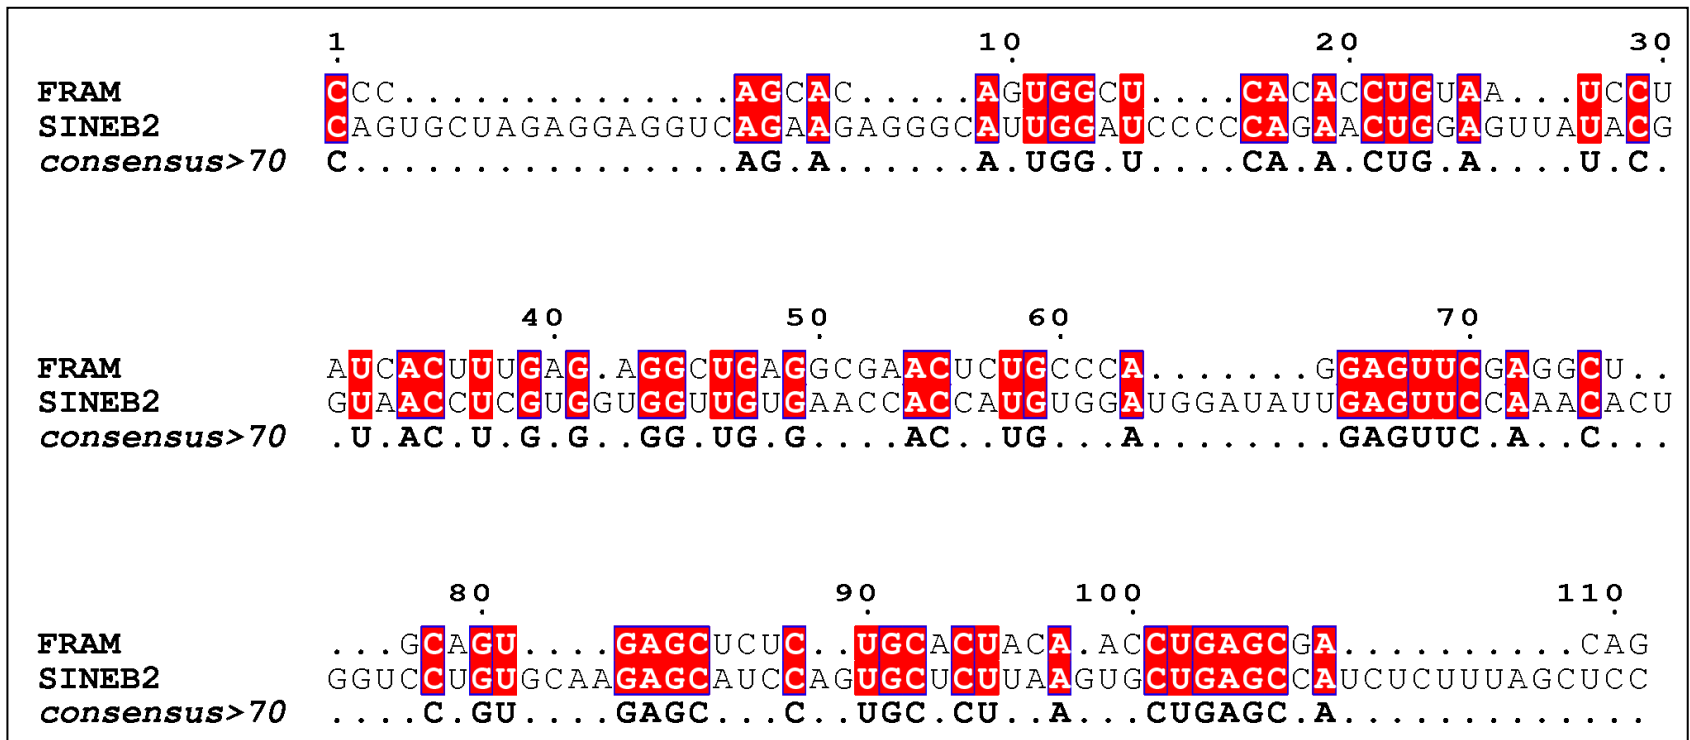

**Supplementary Figure S4. Human FRAM and mouse SINEB2 elements share short common sequences .**

The SINEB2 and FRAM sequences were analyzed by the R-Coffee software, using default parameters and edited by Esript 3.0.

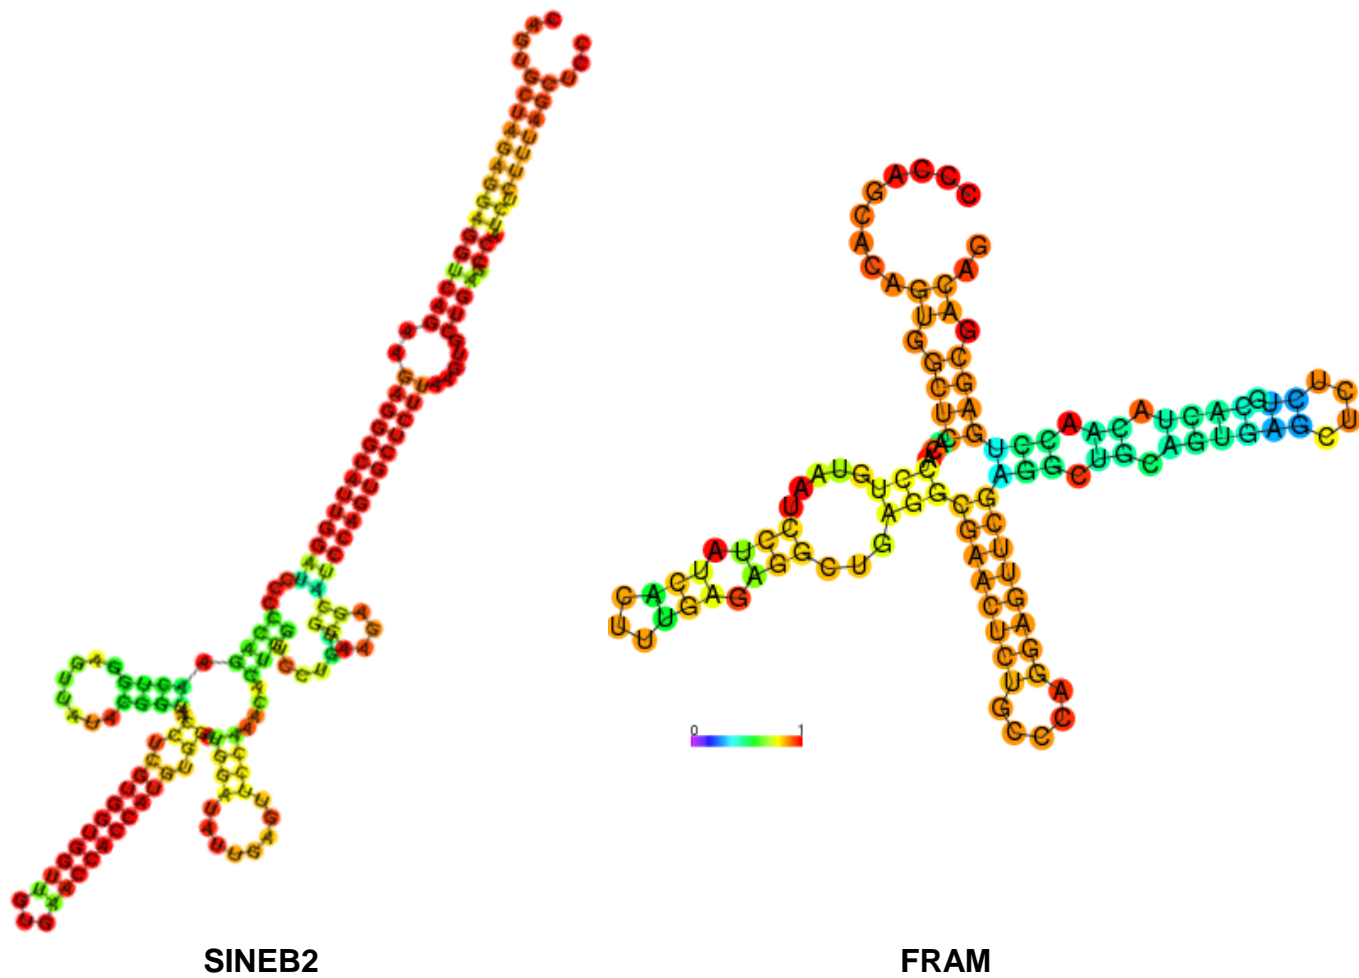

**Supplementary Figure S5. Human FRAM and mouse SINEB2 elements obtain different secondary structures**  
Secondary structure of SINEs, predicted by RNAfold program. Prediction confidence for each base is indicated by the color code.
